# Supplementary material for: Methylphenidate Promotes Premature Growth Plate Closure: In Vitro Evidence
Source: MDPI journal article supplement (doi:10.3390/ijms24044175), 2023-02-20
Supplement: s1 [file s1]

Supplementary Figure S1

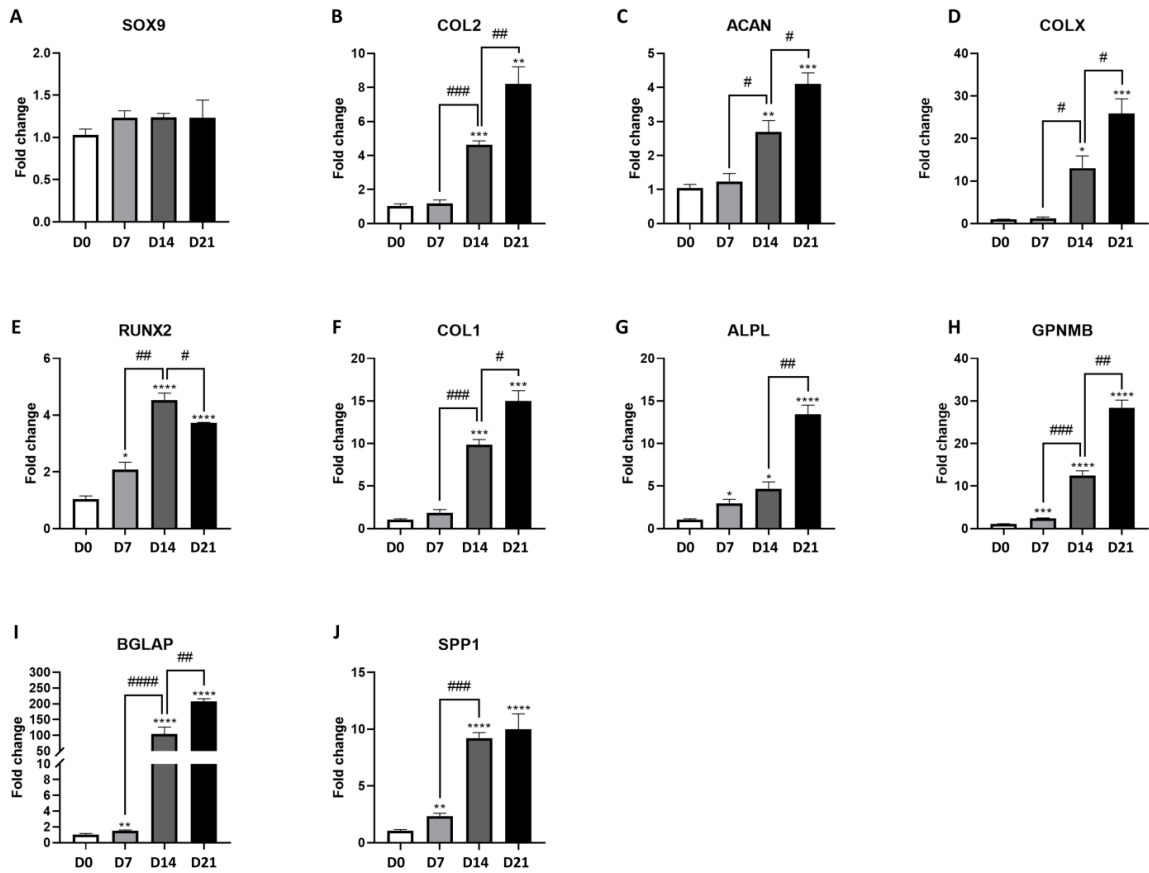

**Figure S1.** Relative expression levels of chondrocyte (a-d) and osteoblast (e-j) markers in ATDC5 cells throughout the 21 days of differentiation only in the control condition. This is to prove that the differentiation was performed correctly. SOX9: SRY-box transcription factor 9; COL2: type II collagen; ACAN: aggrecan; RUNX2: Runt-related transcription factor 2; COL1: type I collagen; ALPL: alkaline phosphatase; GPNMB: osteoactivin; BGLAP: osteocalcin; SPP1: osteopontin. Bars represent means with SEM (n = 3). \*: statistically different vs. day 0 ( $p < 0.05$ ); \*\*:  $p < 0.01$ ; \*\*\*:  $p < 0.001$ ; \*\*\*\*:  $p < 0.0001$ ; #: statistically different vs. untreated control from the same day ( $p < 0.05$ ); ##:  $p < 0.01$ ; ###:  $p < 0.001$ ; ####:  $p < 0.0001$ .

Supplementary Figure S2

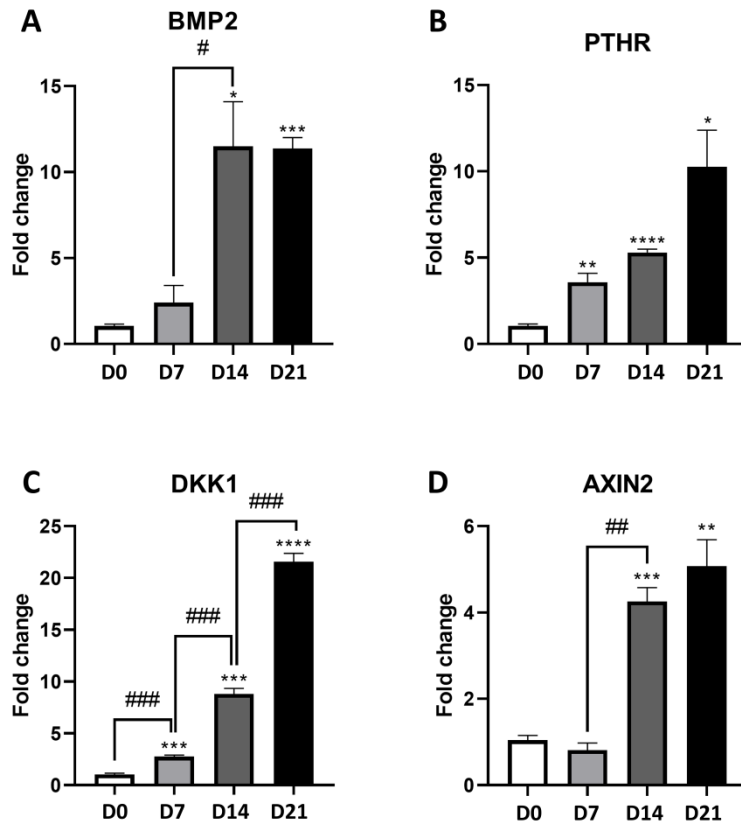

**Figure S2.** Relative expression levels of BMP2 (a), PTHR (b) and Wnt signalling-related genes (c-d) in ATDC5 cells throughout the 21 days of differentiation only in the control condition. This is to prove that the differentiation was performed correctly. BMP: Bone Morphogenetic Protein 2; PTHR: Parathyroid Hormone 1 Receptor; DKK1: Dickkopf WNT Signaling Pathway Inhibitor; AXIN2: Axis Inhibition Protein 2. Bars represent means with SEM (n = 3). \*: statistically different vs. day 0 ( $p < 0.05$ ); \*\*:  $p < 0.01$ ; \*\*\*:  $p < 0.001$ ; \*\*\*\*:  $p < 0.0001$ ; #: statistically different vs. untreated control from the same day ( $p < 0.05$ ); ##:  $p < 0.01$ ; ###:  $p < 0.001$ .
